# Supplementary material for: The Associations between Results in Different Domains of Cognitive and Psychomotor Abilities Measured in Medical Students
Source: MDPI journal article supplement (doi:10.3390/brainsci13020185), 2023-01-22
Supplement: s1 [file s1]

**Supplementary Table S1.** Power analysis was performed in G\*Power Statistical Power Analyses program for Mac and Windows, with the post hoc type of power analysis computed achieving power with a given  $\alpha$  (0.05), sample size ( $N = 224$ ), and effect size.

| Variable            | APM    |
|---------------------|--------|
| <b>TTST 11</b>      |        |
| Pearson's r         | -0.480 |
| <i>p</i> -value     | < .001 |
| Upper 95% CI        | -0.370 |
| Lower 95% CI        | -0.577 |
| Power (1- $\beta$ ) | 1      |
| <b>MINT 11</b>      |        |
| Pearson's r         | -0.436 |
| <i>p</i> -value     | < .001 |
| Upper 95% CI        | -0.320 |
| Lower 95% CI        | -0.538 |
| Power (1- $\beta$ ) | 0.999  |
| <b>TTST 311</b>     |        |
| Pearson's r         | -0.296 |
| <i>p</i> -value     | < .001 |
| Upper 95% CI        | -0.169 |
| Lower 95% CI        | -0.414 |
| Power (1- $\beta$ ) | 0.998  |
| <b>MINT 311</b>     |        |
| Pearson's r         | -0.330 |
| <i>p</i> -value     | < .001 |
| Upper 95% CI        | -0.206 |
| Lower 95% CI        | -0.444 |
| Power (1- $\beta$ ) | 0.999  |
| <b>TTST 411</b>     |        |
| Pearson's r         | -0.440 |
| <i>p</i> -value     | < .001 |
| Upper 95% CI        | -0.326 |
| Lower 95% CI        | -0.542 |
| Power (1- $\beta$ ) | 1      |
| <b>MINT 411</b>     |        |
| Pearson's r         | -0.303 |
| <i>p</i> -value     | < .001 |
| Upper 95% CI        | -0.177 |
| Lower 95% CI        | -0.420 |
| Power (1- $\beta$ ) | 0.999  |
